# Supplementary material
Source: publisher figshare collection journal article supplement (https://karger.figshare.com/articles/dataset/_/4982924)
Supplement: Supplementary file 2 [file 1]

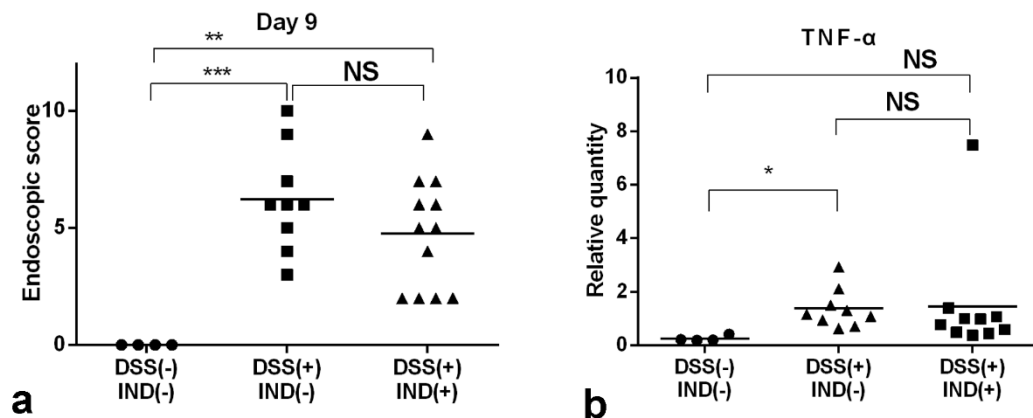

**Fig S3. IND did not influence the severity of DSS colitis**

Mice were treated with 2.5 % DSS (dextran sulfate sodium) in drinking water for 5 days. Mice in the IND(+) group were fed with IND every day. At day 9, evaluation of endoscopic score was performed. At day 10 mice were sacrificed for further analysis. (a) Endoscopic score. (b) Expression level of TNF- $\alpha$  was evaluated by real-time PCR. (DSS(-)IND(-) n = 4, DSS(+)IND(-) n = 9, DSS(+)IND(+) n =12).
