# Supplementary material
Source: publisher figshare collection journal article supplement (https://karger.figshare.com/articles/dataset/_/4982924)
Supplement: Supplementary file 3 [file 1]

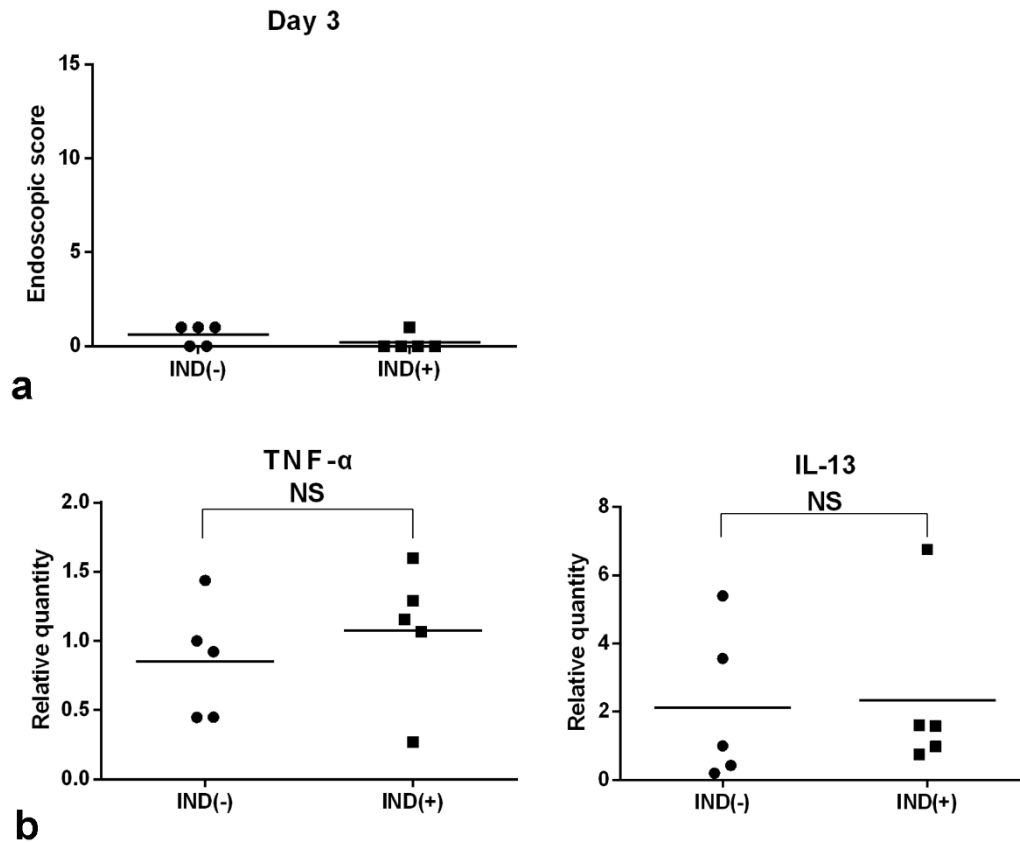

**Fig S1. IND did not induce colitis by itself**

Mice were fed a diet containing 5 % IND. (a) Endoscopic score was recorded. (b) Cytokine expression levels were evaluated by real-time PCR. IND(-) n = 5, IND(+) n = 5.
